# Supplementary material for: Dual photothermal MDSCs-targeted immunotherapy inhibits lung immunosuppressive metastasis by enhancing T-cell recruitment
Source: Royal Society of Chemistry journal article supplement (doi:10.1039/d0nr00080a), 2020-01-01
Supplement: d0nr00080a1.pdf [file d0nr00080a1.pdf]

# Supplementary Figure 1

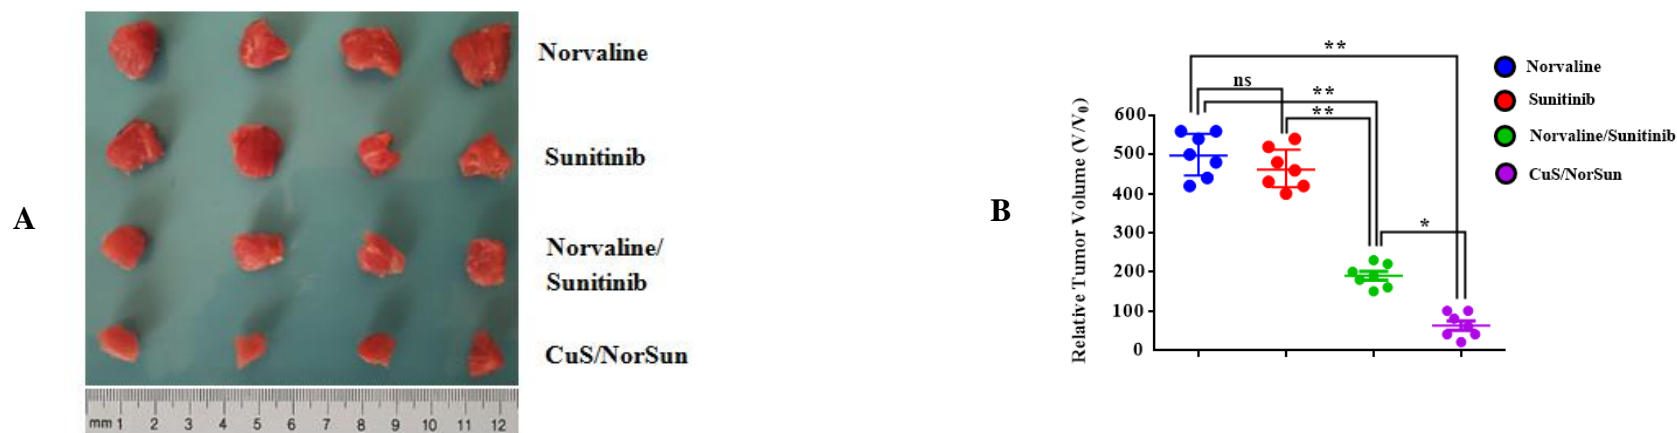

**Figure 4.** In vivo antitumor efficacy of Norvaline/Sunitinib and CuS/NorSun NCs against A549 tumor xenografts. **(A)** Representative images of excised tumors from mice after treatment with Norvaline/Sunitinib (4 mg/kg) and CuS/MDSCs NCs (5 mg/kg) **(B)** Relative tumor volumes of A549 tumor bearing mice following treatment. Relative tumor volumes ( $V/V_0$ ) of A549 tumor bearing mice following intravenous administration of Norvaline/Sunitinib and CuS/MDSCs NCs. Data represent the mean  $\pm$ SD of three independent experiments (\* $P < 0.05$ ; \*\* $P < 0.01$ ).
