# Supplementary material for: Dual photothermal MDSCs-targeted immunotherapy inhibits lung immunosuppressive metastasis by enhancing T-cell recruitment
Source: Royal Society of Chemistry journal article supplement (doi:10.1039/d0nr00080a), 2020-01-01
Supplement: d0nr00080a3.pdf [file d0nr00080a3.pdf]

| <b>Clinical Characteristics</b> | <b>Mean Age</b> | <b>Sex</b>      |                | <b>Histological Type</b>       |                        |                             |
|---------------------------------|-----------------|-----------------|----------------|--------------------------------|------------------------|-----------------------------|
|                                 |                 | <b>Male</b>     | <b>Female</b>  | <b>Squamous cell carcinoma</b> | <b>Adeno-carcinoma</b> | <b>Large cell carcinoma</b> |
| <b>Number of patients</b>       | <b>67</b>       | <b>56 (59)*</b> | <b>40 (41)</b> | <b>37 (39)</b>                 | <b>29 (30)</b>         | <b>30 (31)</b>              |

**Table S1.** Clinical characteristics of lung cancer patients. (\*) Numbers in parenthesis indicate percentiles (%) in the total population of patients.
