# Supplementary material for: Dual photothermal MDSCs-targeted immunotherapy inhibits lung immunosuppressive metastasis by enhancing T-cell recruitment
Source: Royal Society of Chemistry journal article supplement (doi:10.1039/d0nr00080a), 2020-01-01
Supplement: d0nr00080a4.pdf [file d0nr00080a4.pdf]

| KRAS codon 12 Mutation Status |    |                    |                    |                    |                    |                    |                    |
|-------------------------------|----|--------------------|--------------------|--------------------|--------------------|--------------------|--------------------|
| Clinical Features             | n  | Gly12Cys<br>(G12C) | Gly12Val<br>(G12V) | Gly12Asp<br>(G12D) | Gly12Arg<br>(G12R) | Gly12Ala<br>(G12A) | Gly12Ser<br>(G12S) |
| Stage I                       | 24 | 10(42)             | 4(17)              | 4(17)              | 3(12)              | 1(4)               | 2(8)               |
| Stage II                      | 26 | 12(46)             | 5(19)              | 3(12)              | 3(12)              | 2(8)               | 1(4)               |
| Stage III                     | 42 | 17(40)             | 9(21)              | 5(12)              | 5(12)              | 3(7)               | 3(7)               |
| Stage IV                      | 32 | 19(60)             | 5(16)              | 3(9)               | 2(6)               | 2(6)               | 1(3)               |
| Chemoresistant                | 51 | 28(55)             | 12(23)             | 4(8)               | 3(6)               | 1(2)               | 3(6)               |
| Chemosensitive                | 45 | 11(24)             | 9(20)              | 8(18)              | 7(16)              | 6(13)              | 4(9)               |
| Metastatic                    | 47 | 32(68)             | 8(17)              | 3(6)               | 2(4)               | 1(2)               | 1(2)               |
| Non-metastatic                | 49 | 12(24)             | 11(22)             | 8(16)              | 9(18)              | 5(10)              | 4(8)               |

**Table S2.** Correlation between KRAS mutation status in lung cancer patients. Numbers in parenthesis indicate percentiles (%) in the total population of patients.
